# Supplementary material
Source: PubMed Central journal article supplement (PMC5391142)
Supplement: EMBJ-36-995-s002.pdf [file EMBJ-36-995-s002.pdf]

## Expanded View Figures

**Figure EV1. Assessment of cellular localization of FOXO1 and phospho-mimicking FOXO1 peptide HA-FOXO1-IQBP S319E and its wild-type (S319) and non-phosphorylatable (S319A) counterparts in PCa cells.**

- A, B Immunofluorescence cytochemistry using antibodies for anti-Flag and IQGAP1 in LNCaP cells transfected with control vector (pcDNA3.1) and plasmids for Flag-FOXO1-WT, Flag-FOXO1-NESm, and Flag-FOXO1-NLSm. Cellular localization (nuclear, cytoplasm, or both) was photographed (A) and analyzed in > 100 cells in each experimental condition (B). Scale bars, 20  $\mu$ m. The experiment was repeated at least once and similar results were obtained.
- C Immunofluorescence cytochemistry using antibodies for anti-HA and IQGAP1 in LNCaP cells transfected with empty vector (E.V.) pcDNA3.1 and plasmids for phospho-mimicking FOXO1 peptide HA-FOXO1-IQBP S319E and its wild-type (S319) and non-phosphorylatable (S319A) counterparts. > 100 cells in each experimental condition were analyzed. Scale bars, 20  $\mu$ m. The experiment was repeated at least once and similar results were obtained.
- D LNCaP cells were transfected with SFB-tagged empty vector (SFB-EV) and SFB-tagged plasmids for phospho-mimicking FOXO1 peptide SFB-FOXO1-IQBP S319E and its wild-type (S319) and non-phosphorylatable (S319A) counterparts. 24 h after transfection, cells were harvested and lysed for co-IP with IgG or anti-Flag antibodies and immunoprecipitated proteins were analyzed by Western blotting. SFB tags are S, Flag, and biotin-binding protein (streptavidin) binding peptide tags. These three tags encode an ~12-kDa peptide (119 amino acids).
- E LNCaP cells were transfected with SFB-tagged plasmids for phospho-mimicking FOXO1 peptides SFB-FOXO1-IQBP S319E and S319D and the non-phosphorylatable counterpart S319A. 24 h after transfection, cells were harvested and lysed for co-IP with IgG or anti-Flag antibodies and immunoprecipitated proteins were analyzed by Western blotting.
- F LNCaP cells were transfected with SFB-tagged empty vector (EV) and SFB-tagged plasmids for SFB-FOXO1-IQBP S319E and its wild-type (S319) and non-phosphorylatable (S319A) counterparts. 24 h after transfection, cells were harvested and lysed for co-IP with IgG or anti-IQGAP1 antibodies and immunoprecipitated proteins were analyzed by Western blotting using indicated antibodies.
- G Limited proteolysis assay. Limited proteolysis of GST-IQGAP1 incubated with GST-FOXO1-IQBP S319E or GST alone using trypsin. Proteolysis was carried out on ice for the times indicated under each lane. The products of proteolysis were resolved by 13.5% acrylamide SDS-PAGE and visualized by staining with Coomassie blue. The experiments were repeated once, and similar results were obtained.

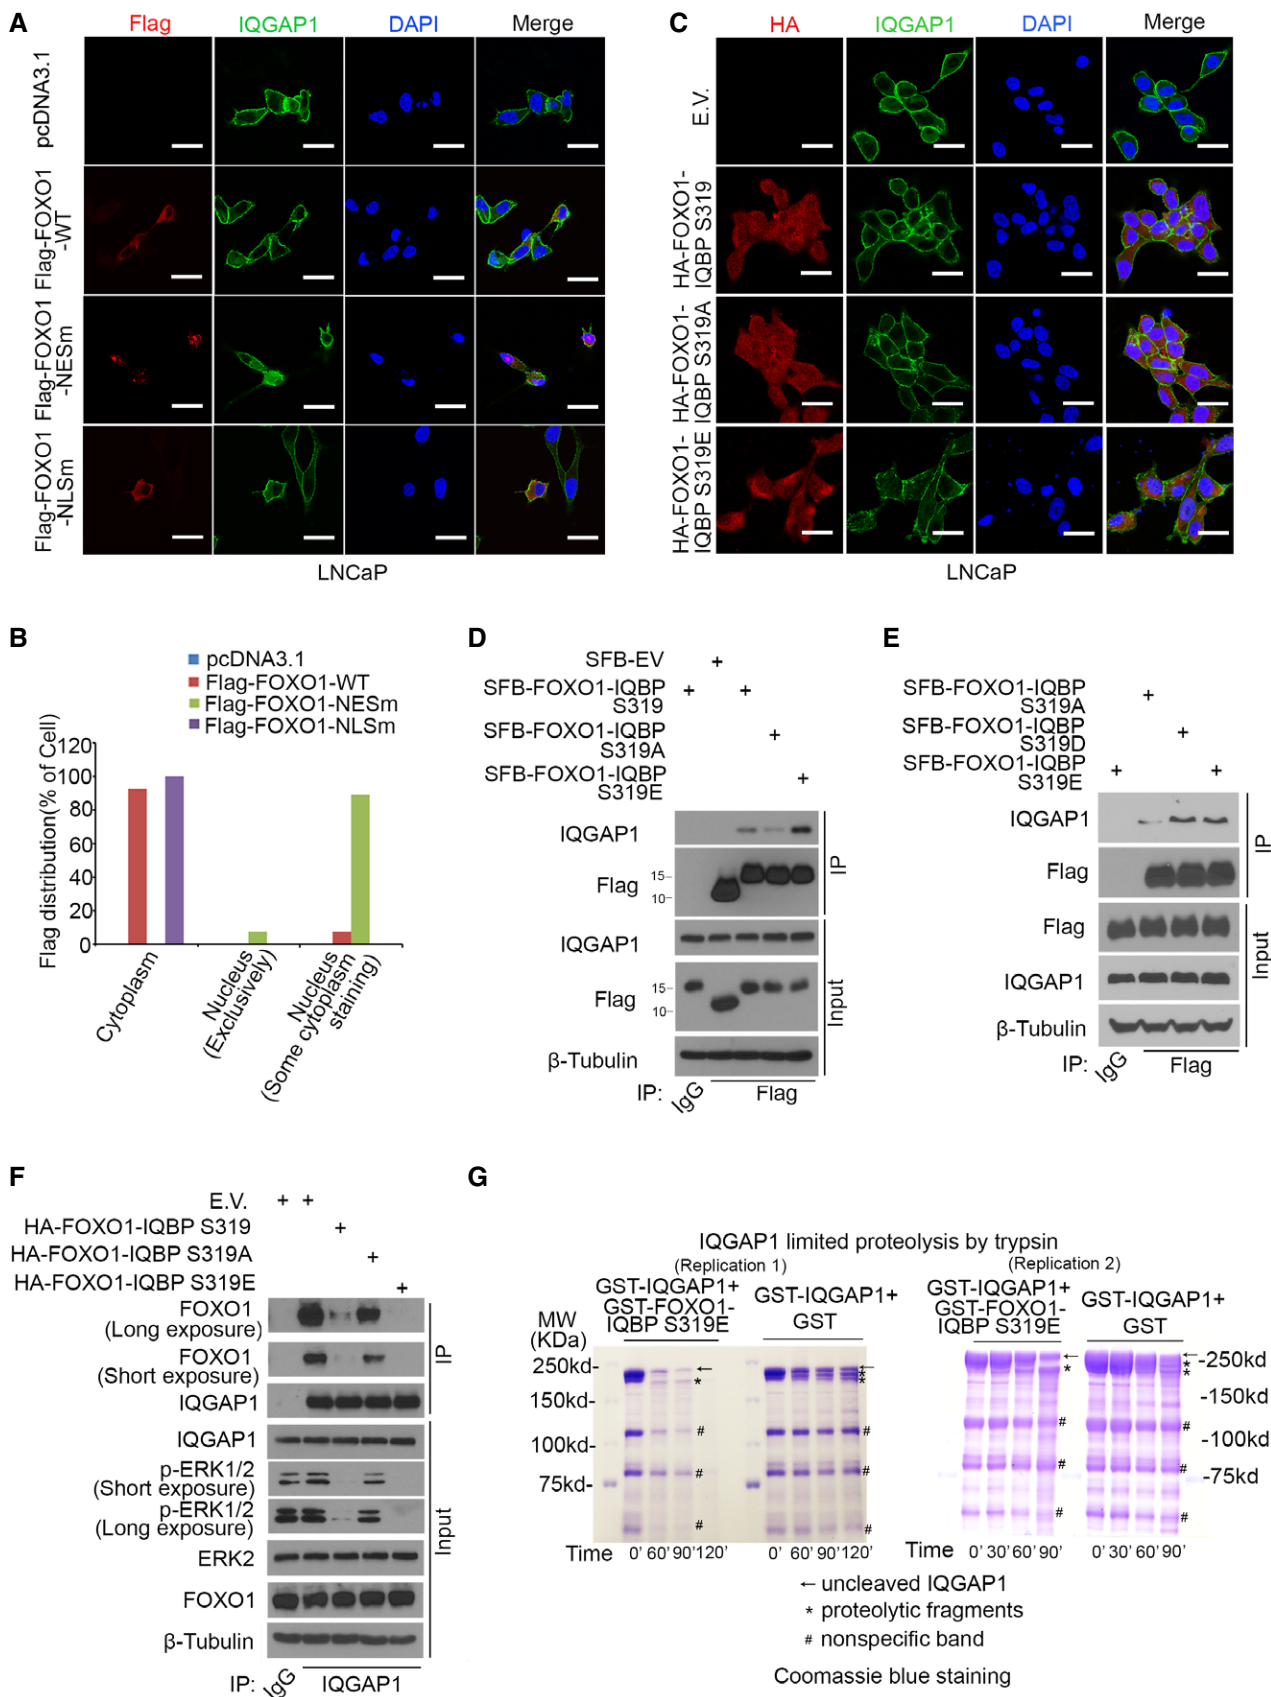

Figure EV1.

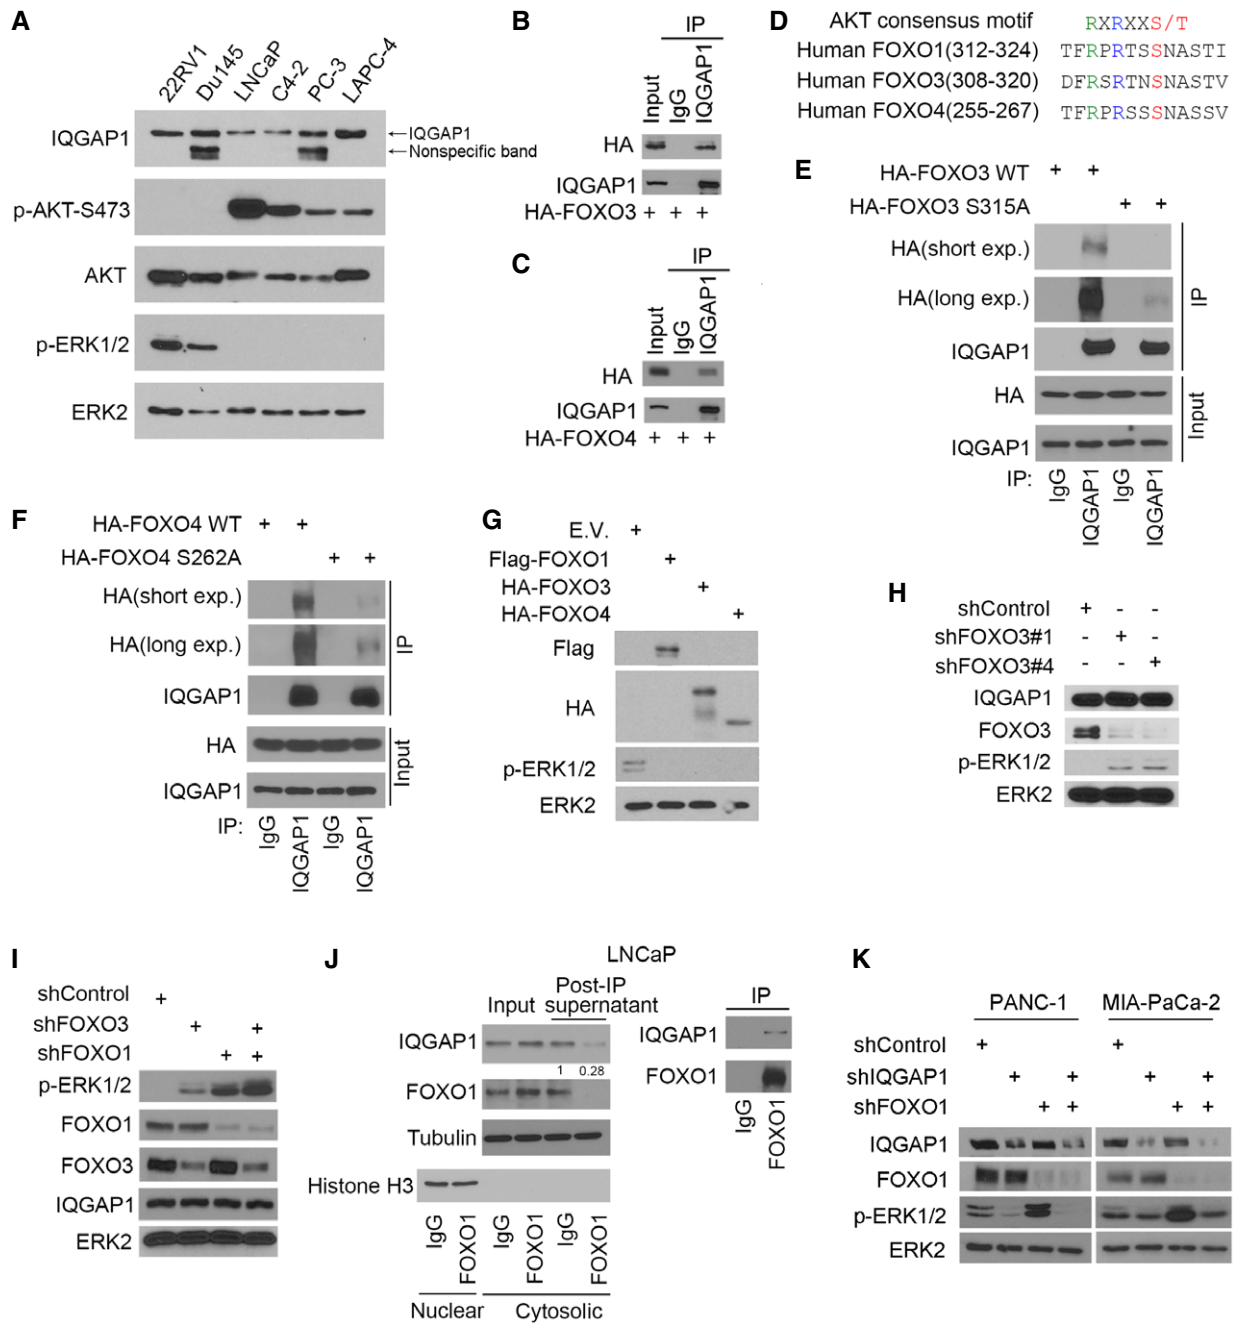

**Figure EV2. Assessment of the interaction of IQGAP1 with FOXO3 and FOXO4, their effect on ERK1/2 phosphorylation and effect of FOXO1 on ERK1/2 phosphorylation in non-prostate cancer cells.**

- A Western blot analysis of expression of phospho-AKT (serine 473) and ERK1/2 in prostate cancer cell lines indicated. Arrow indicates non-specific reaction protein bands.
- B, C Western blot analysis of whole-cell lysate (WCL) and co-immunoprecipitation (co-IP) samples of IgG or anti-IQGAP1 antibody from LNCaP cells 24 h after transfection with HA-FOXO3 (B) or HA-FOXO4 (C).
- D Comparison of S319, an AKT phosphorylation site in FOXO1 with the homologous site in FOXO3 (S315) and FOXO4 (S262) by multiple sequence alignments.
- E, F Western blot analysis of WCL and co-IP samples from LNCaP cells 24 h after transfection with indicated plasmids.
- G Western blot analysis of WCL from DU145 cells 24 h after transfection with indicated plasmids. E.V., empty vector.
- H, I Western blot analysis of WCL from LNCaP cells 48 h after infection with lentivirus expressing indicated shRNAs.
- J Western blot analysis of indicated proteins in cytosolic fractionation (input), the supernatant post IP and co-IP samples from LNCaP cells. Nuclear fractionation was used to indicate the effectiveness of the fractionation.
- K Western blot analysis of WCL from PANC-1 and MIA-PaCa-2 cells 48 h after infection with lentivirus expressing indicated shRNAs.

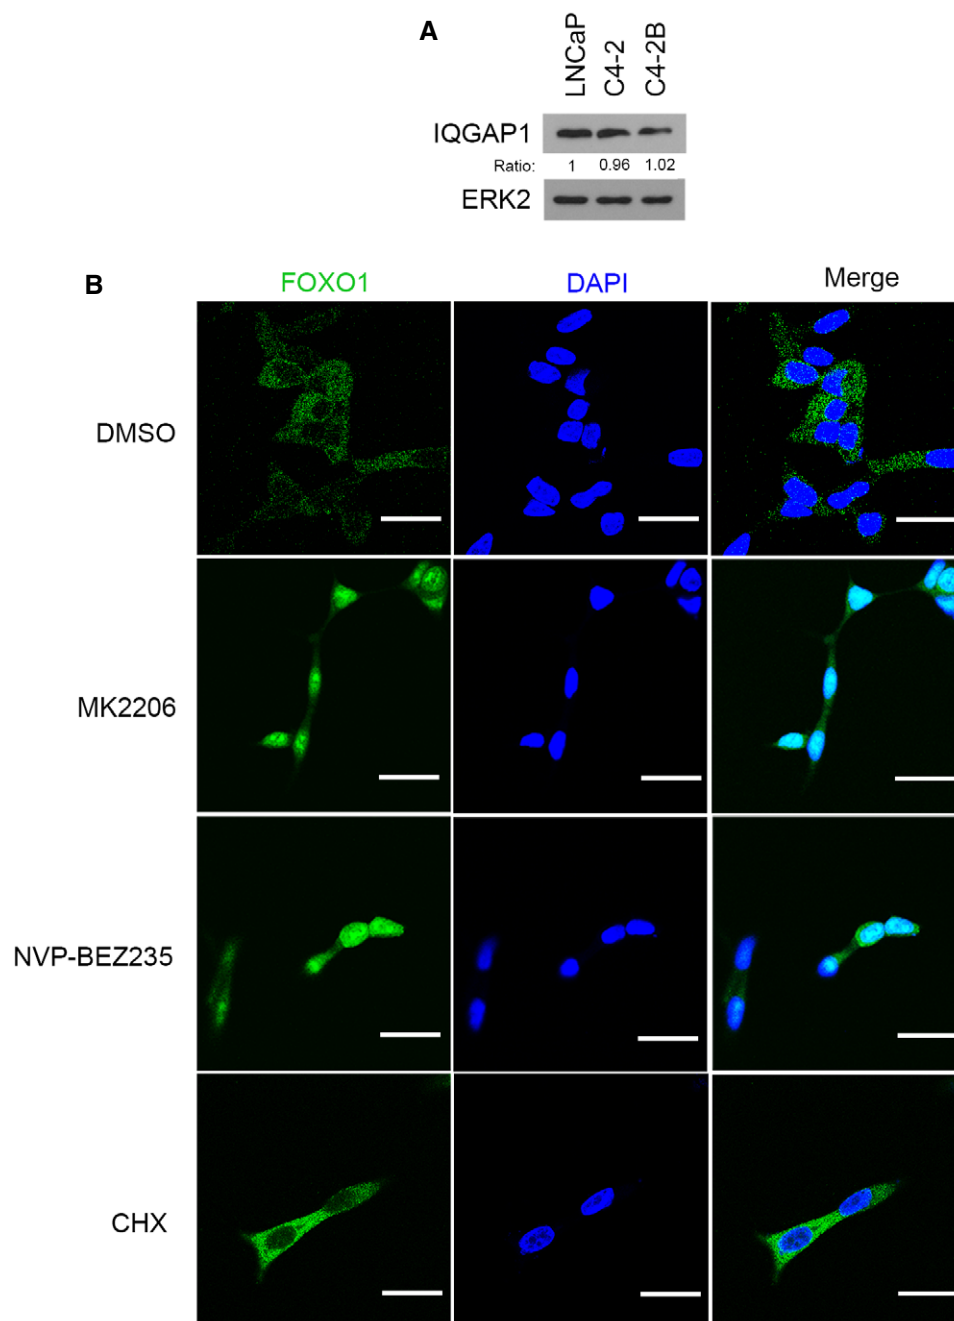

**Figure EV3. Assessment of IQGAP1 protein expression in PCa cell lines and effect of PI3K/AKT inhibitors and CHX on cellular localization of FOXO1.**

**A** Western blot analysis of IQGAP1 protein expression in prostate cancer cell lines LNCaP, C4-2, and C4-2B. ERK2 was used as a loading control. The density of IQGAP1 was determined by normalizing to ERK2 first and then to the normalized value in LNCaP cells.

**B** Immunofluorescence cytochemistry using anti-FOXO1 antibody in LNCaP (PTEN-negative and FOXO1 in the cytoplasm) cells treated with DMSO, MK2206 (0.5  $\mu$ M), NVP-BEZ235 (50 nM), and CHX (20  $\mu$ g/ml) for 24 h. > 100 cells in each experimental condition were analyzed. Scale bars, 20  $\mu$ m. The experiment was repeated at least once and similar results were obtained.

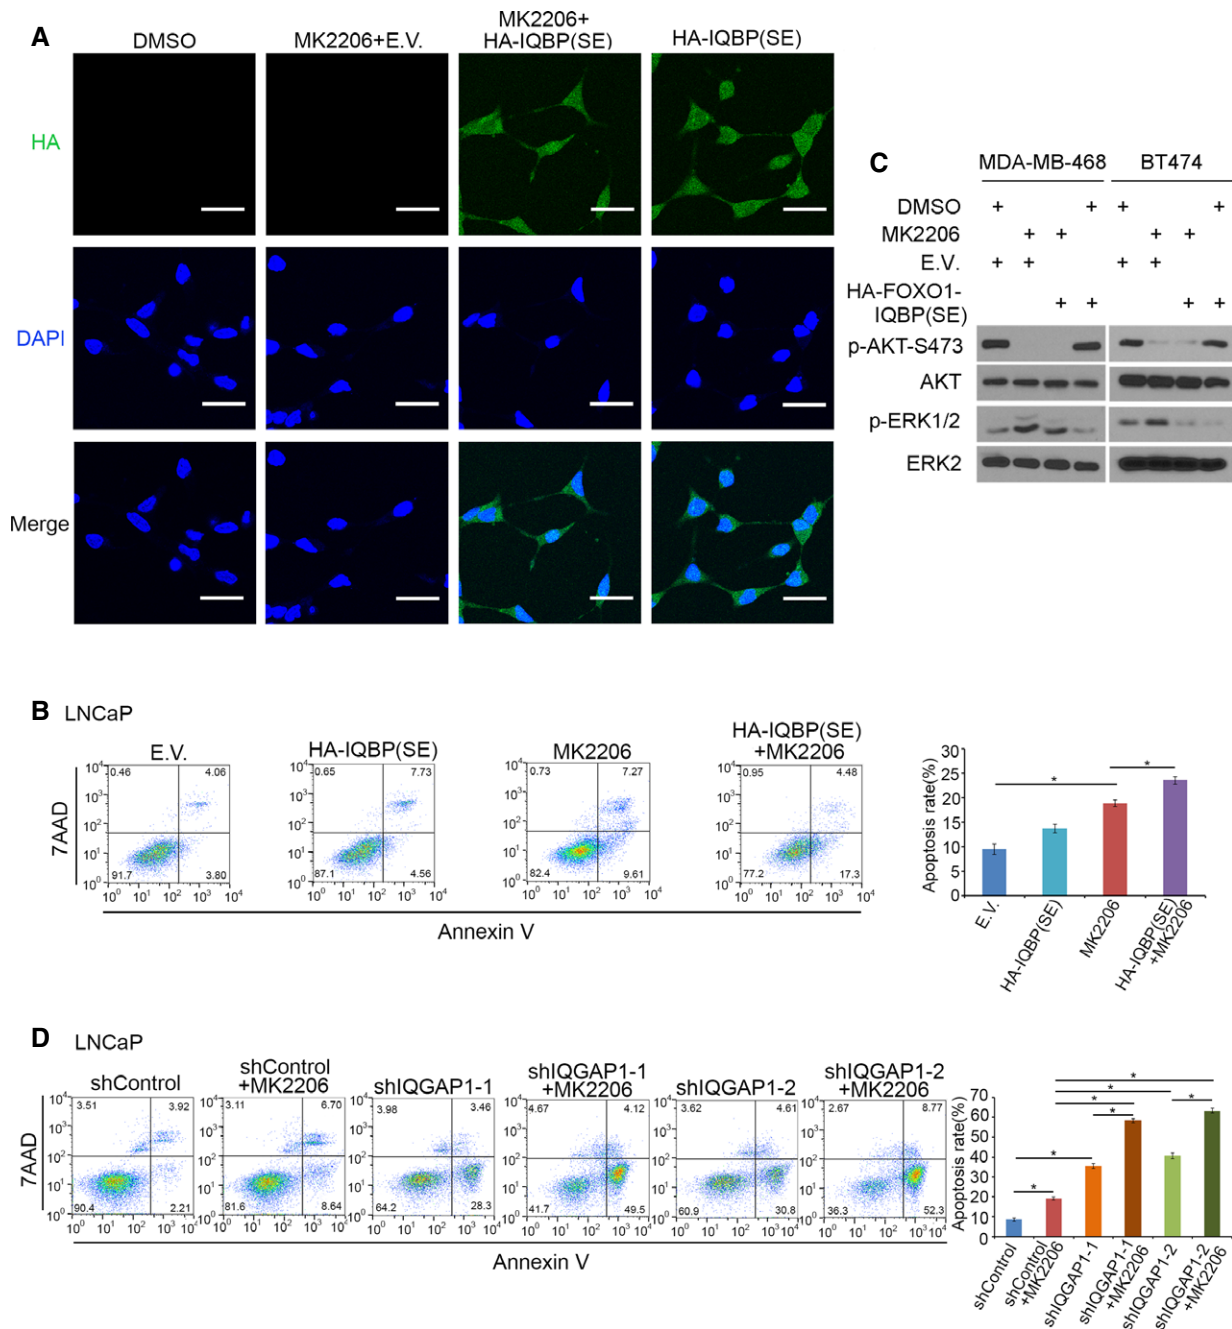

**Figure EV4. Assessment of effect of FOXO1 phospho-mimicking peptide on AKT inhibitor-induced cell death and pERK1/2.**

A, B LNCaP cells were transfected with empty vector (E.V.) or the FOXO1 phospho-mimicking peptide HA-FOXO1-IQBP(SE) for 24 h and then treated with or without MK2206 (0.5  $\mu$ M) for 24 h followed by immunofluorescence cytochemistry using anti-HA antibody (A) and Annexin V assay and flow cytometry analysis (B). For panel (A), > 100 cells in each experimental condition were analyzed. Scale bars, 20  $\mu$ m. The experiment was repeated at least once and similar results were obtained. For panel (B), data from two biological replicates were quantified (means  $\pm$  s.d.,  $n = 2$ ). \* $P = 0.001687442$  comparing MK2206 versus EV; \* $P = 0.014293987$  comparing MK2206 + EV versus MK2206 + IQBP(SE) (two-sided Student's *t*-test at the 48-h time point).

C Western blot analysis of whole-cell lysate from indicated cell lines 24 h after transfection with empty vector (E.V.) and the FOXO1 phospho-mimicking peptide HA-FOXO1-IQBP(SE) and then treated with or without MK2206 (0.5  $\mu$ M) for 24 h.

D Annexin V assay and flow cytometry analysis. 72 h after infection with lentivirus expressing indicated shRNAs, LNCaP cells treated with or without MK2206 (0.5  $\mu$ M) for 24 h. Quantitative data were obtained from two biological replicates (means  $\pm$  s.d.,  $n = 2$ ). \* $P = 0.004378751$  comparing shControl versus shControl + MK2206; \* $P = 0.001300305$  comparing shIQGAP1-1 versus shIQGAP1-1 + MK2206; \* $P = 0.000554$  comparing shIQGAP1-2 versus shIQGAP1-2 + MK2206; \* $P = 0.000967413$  comparing shIQGAP1-1 versus shControl; \* $P = 0.000363332$  comparing shIQGAP1-2 versus shControl; \* $P = 0.000232676$  comparing shIQGAP1-1 + MK2206 versus shControl + MK2206; \* $P = 0.000180198$  comparing shIQGAP1-2 + MK2206 versus shControl + MK2206 (two-sided Student's *t*-test at the 48-h time point).

**Figure EV5. The FOXO1 small peptide inhibits taxol-induced ERK activation and chemoresistance.**

- A Immunofluorescence cytochemistry using indicated antibodies in LNCaP and BT474 cells 24 h after transfection with empty vector (EV) or FOXO1-IQBP(SE) and then treated with or without paclitaxel (PTX) (10 nM) for 24 h. E-cadherin was used to mark the plasma membrane (cell boundary). > 100 cells were analyzed in each experimental condition. Scale bars, 20  $\mu$ m. The experiment was repeated at least once and similar results were obtained.
- B Western blot analysis of whole-cell lysate (WCL) from LNCaP cells treated with or without paclitaxel (10 nM) for 24 h before harvest.
- C Western blot analysis of WCL from LNCaP cells 24 h after transfection with indicated plasmids and then treated with or without docetaxel (10 nM) for 24 h.
- D Western blot analysis of WCL from PC-3-Luc cells 72 h after infection with lentivirus expressing empty vector (pTsin) or FOXO1-IQBP(SE). Cells were then treated with or without docetaxel (10 nM) for 24 h prior to harvest.
- E Immunofluorescence cytochemistry using anti-HA antibody in PC-3-Luc cells 72 h after infection with lentivirus expressing indicated empty vector or HA-FOXO1-IQBP (SE). Cells were then treated with or without docetaxel (10 nM) for 24 h. > 100 cells were analyzed in each experimental condition. Scale bars, 50  $\mu$ m. The experiment was repeated at least once and similar results were obtained.
- F Immunofluorescence histochemistry using anti-phospho-ERK (p-ERK) and anti-HA antibodies in frozen sections acquired from indicated mouse xenografts harvested at the end of treatment. > 100 cells were analyzed in each experimental condition. Scale bars, 50  $\mu$ m. Similar experiments were performed in samples obtained from at least three animals ( $n = 3$ ).
- G MTS assay performed in PC-3-Luc cells. 72 h after infection with lentivirus expressing empty vector (EV) or HA-IQBP(SE), cells were treated with or without docetaxel (10 nM) for 24 h (means  $\pm$  s.d.,  $n = 6$ ). \* $P = 1.24674E-07$  comparing EV+DMSO versus EV+DTX; \* $P = 3.29127E-07$  comparing IQBP(SE)+DTX versus EV+DTX (two-sided Student's  $t$ -test at the 4-day time point).

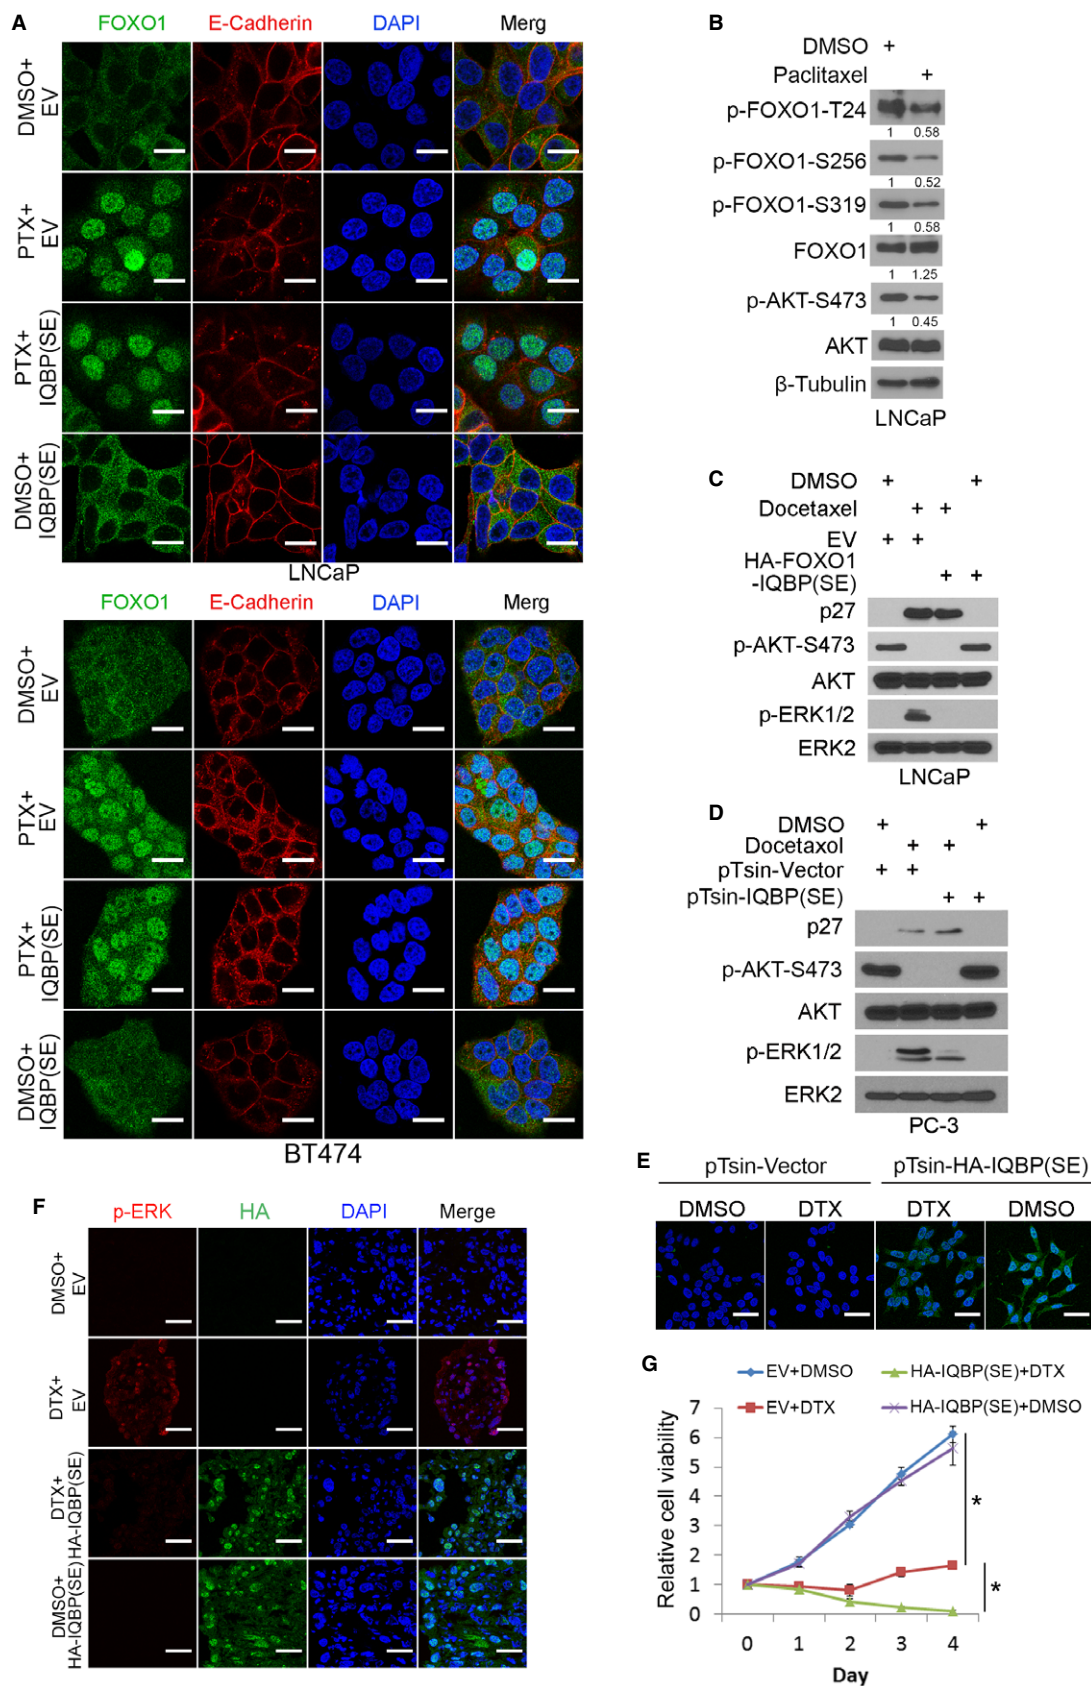

Figure EV5.
